# Supplementary material for: A bio-inspired nacre-like layered hybrid structure of calcium carbonate under the control of carboxyl graphene
Source: Royal Society of Chemistry journal article supplement (doi:10.1039/c4ce01632g), 2014-09-19
Supplement: c4ce01632g1.pdf [file c4ce01632g1.pdf]

## Supporting Information

# Bio-Inspired Nacre-like Layered Hybrid Structure of Calcium Carbonate under the Control of Carboxyl Graphene

Jie Li,<sup>ab</sup> Dandan Liu,<sup>b</sup> Bo Li,<sup>b</sup> Hao Wei,<sup>\*ab</sup> Jun Wang,<sup>ab</sup> Shihui Han,<sup>ab</sup> and Lianhe Liu,<sup>ab</sup>

<sup>a</sup> Key Laboratory of Superlight Material and Surface Technology of Ministry of Education,  
College of Material Science and Chemical Engineering, Harbin Engineering University,  
Harbin 150001, PR China.

<sup>b</sup> Institute of Advanced Marine Materials, Harbin Engineering University, Harbin 150001, PR  
China.

**\*Corresponding Author:** E-mail: weihao7512@126.com

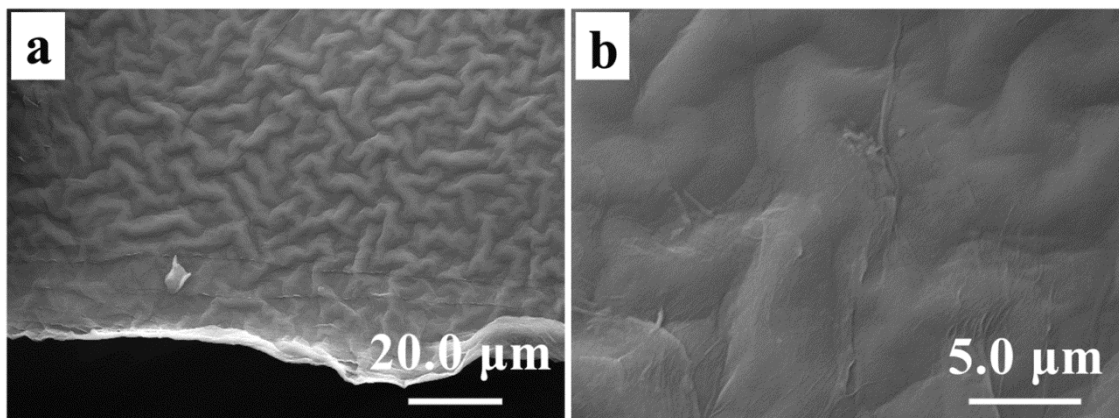

**Fig. S1** SEM images of 0.5mg/mL GO-COOH aqueous solution after dried at 40 °C in a vacuum for 24 h, b) high magnification SEM images of a). It reveals a wrinkle structure.

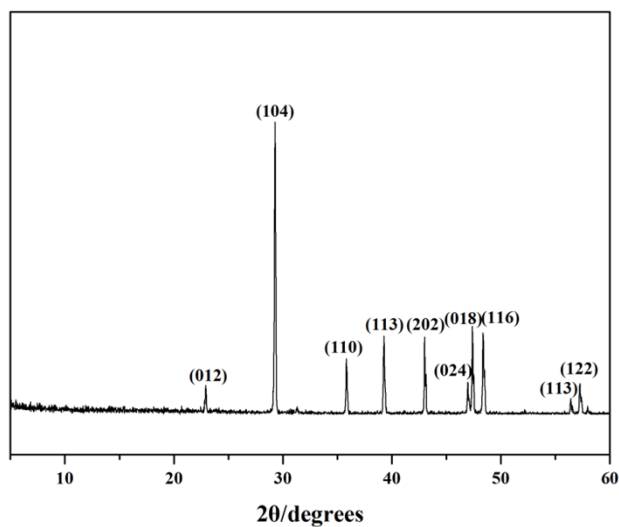

**Fig. S2** Typical XRD diffraction patterns of pure CaCO<sub>3</sub> crystals in aqueous solution after 24 h of reaction.

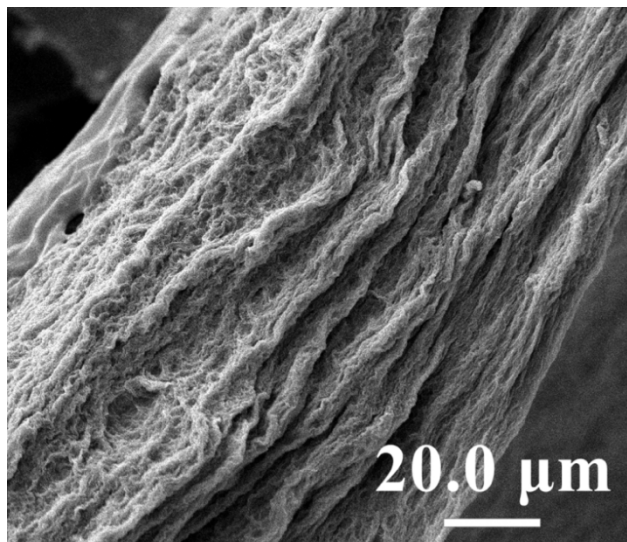

**Fig. S3** SEM image of the cross section of GO-COOH/CaCl<sub>2</sub> hybrids. It reveals a loose layered structure.
